# Supplementary material
Source: publisher figshare collection journal article supplement (https://frontiersin.figshare.com/ndownloader/files/25818029)
Supplement: Supplementary file 1 [file 25818029]

## Sheet: Supplemntr Table 1
Population Sample	ID	Date	EEZ	Latitude	Longitude	length_mm	calculated_wt_gr	sex_id
FM08	1	2008-06-28	FM	2.04013	156.035	620	4121.78	F
FM08	2	2008-06-28	FM	2.04013	156.035	600	3730.24	F
FM08	3	2008-06-28	FM	2.04013	156.035	450	1553.9	F
FM08	4	2008-06-28	FM	2.04013	156.035	400	1085.71	F
FM08	5	2008-06-28	FM	2.04013	156.035	360	787.824	F
FM08	6	2008-06-28	FM	2.04013	156.035	370	856.348	M
FM08	7	2008-06-28	FM	2.04013	156.035	470	1773.82	F
FM08	8	2008-06-28	FM	2.04013	156.035	410	1170.46	M
FM08	9	2008-06-28	FM	2.04013	156.035	590	3544.2	F
FM08	10	2008-06-28	FM	2.04013	156.035	360	787.824	F
FM08	11	2008-06-28	FM	2.04013	156.035	360	787.824	F
FM08	12	2008-06-28	FM	2.04013	156.035	390	1005.18	F
FM08	13	2008-06-28	FM	2.04013	156.035	400	1085.71	F
FM08	14	2008-06-28	FM	2.04013	156.035	600	3730.24	F
FM08	15	2008-06-28	FM	2.04013	156.035	610	3922.73	M
FM08	16	2008-07-05	FM	5.7319	157.821	510	2274.51	F
FM08	17	2008-07-05	FM	5.7319	157.821	490	2013.73	F
FM08	18	2008-07-05	FM	5.7319	157.821	540	2706.77	F
FM08	19	2008-07-05	FM	5.7319	157.821	510	2274.51	F
FM08	20	2008-07-05	FM	5.7319	157.821	520	2413.01	F
FM08	21	2008-07-05	FM	5.7319	157.821	500	2141.45	F
FM08	22	2008-07-05	FM	5.7319	157.821	520	2413.01	M
FM08	23	2008-07-05	FM	5.7319	157.821	490	2013.73	M
FM08	24	2008-07-05	FM	5.7319	157.821	490	2013.73	M
FM08	25	2008-07-05	FM	5.7319	157.821	540	2706.77	M
FM08	26	2008-07-05	FM	5.7319	157.821	500	2141.45	M
FM08	28	2008-07-05	FM	5.7319	157.821	490	2013.73	F
FM08	29	2008-07-05	FM	5.7319	157.821	520	2413.01	F
FM08	30	2008-07-05	FM	5.7319	157.821	500	2141.45	M
FM08	31	2008-07-06	FM	5.02015	155.97	340	662.012	F
GL09	61	2009-04-27	GL	1.99293	172.855	500	2141.45	M
GL09	62	2009-04-27	GL	1.99293	172.855	450	1553.9	F
GL09	63	2009-04-27	GL	1.99293	172.855	460	1661.42	F
GL09	64	2009-04-27	GL	1.99293	172.855	460	1661.42	F
GL09	65	2009-04-27	GL	1.99293	172.855	440	1451.16	F
GL09	66	2009-04-27	GL	1.99293	172.855	450	1553.9	F
GL09	67	2009-04-27	GL	1.99293	172.855	450	1553.9	F
GL09	68	2009-04-27	GL	1.99293	172.855	450	1553.9	F
GL09	69	2009-04-27	GL	1.99293	172.855	430	1353.08	M
GL09	70	2009-04-27	GL	1.99293	172.855	460	1661.42	F
GL09	71	2009-04-27	GL	1.99293	172.855	440	1451.16	F
GL09	72	2009-04-27	GL	1.99293	172.855	430	1353.08	F
GL09	73	2009-04-27	GL	1.99293	172.855	450	1553.9	M
GL09	74	2009-04-27	GL	1.99293	172.855	460	1661.42	F
GL09	75	2009-04-27	GL	1.99293	172.855	460	1661.42	F
GL09	76	2009-04-23	GL	3.9791	172.98	680	5460.11	F
GL09	77	2009-04-23	GL	3.9791	172.98	600	3730.24	M
GL09	78	2009-04-23	GL	3.9791	172.98	650	4759.4	F
GL09	79	2009-04-23	GL	3.9791	172.98	620	4121.78	M
GL09	80	2009-04-23	GL	3.9791	172.98	640	4540	M
GL09	81	2009-04-23	GL	3.9791	172.98	650	4759.4	M
GL09	82	2009-04-23	GL	3.9791	172.98	610	3922.73	M
GL09	83	2009-04-23	GL	3.9791	172.98	650	4759.4	M
GL09	84	2009-04-23	GL	3.9791	172.98	600	3730.24	M
GL09	85	2009-04-23	GL	3.45747	173.076	430	1353.08	F
GL09	86	2009-04-23	GL	3.45747	173.076	430	1353.08	M
GL09	87	2009-04-23	GL	3.45747	173.076	440	1451.16	M
GL09	88	2009-04-23	GL	3.45747	173.076	440	1451.16	M
GL09	89	2009-04-23	GL	3.45747	173.076	440	1451.16	F
GL09	90	2009-04-23	GL	3.45747	173.076	450	1553.9	M
GL09	91	2009-04-23	GL	3.45747	173.076	440	1451.16	M
MH09	111	2009-04-15	MH	5.87167	169.777	460	1661.42	F
MH09	112	2009-04-15	MH	5.87167	169.777	450	1553.9	M
MH09	114	2009-04-15	MH	5.87167	169.777	440	1451.16	F
MH09	115	2009-04-15	MH	5.87167	169.777	450	1553.9	F
MH09	116	2009-04-17	MH	5.78117	169.587	490	2013.73	M
MH09	117	2009-04-17	MH	5.78117	169.587	460	1661.42	M
MH09	118	2009-04-17	MH	5.78117	169.587	440	1451.16	F
MH09	119	2009-04-18	MH	6.3071	169.394	450	1553.9	F
MH09	120	2009-04-18	MH	6.3071	169.394	500	2141.45	F
MH09	121	2009-04-18	MH	6.3071	169.394	520	2413.01	M
MH09	122	2009-04-18	MH	6.3071	169.394	510	2274.51	M
MH09	124	2009-04-18	MH	6.3071	169.394	480	1891.22	M
MH09	125	2009-04-18	MH	6.3071	169.394	520	2413.01	M
MH09	126	2009-04-18	MH	6.3071	169.394	490	2013.73	F
MH09	127	2009-04-18	MH	6.3071	169.394	460	1661.42	F
MH09	128	2009-04-18	MH	6.3071	169.394	460	1661.42	M
MH09	129	2009-04-18	MH	6.3071	169.394	470	1773.82	F
MH09	130	2009-04-18	MH	6.3071	169.394	500	2141.45	M
MH09	131	2009-04-18	MH	6.3071	169.394	500	2141.45	M
MH09	132	2009-04-18	MH	6.3071	169.394	470	1773.82	M
MH09	133	2009-04-19	MH	6.16958	171.423	530	2557.05	F
MH09	134	2009-04-19	MH	6.16958	171.423	510	2274.51	F
MH09	135	2009-04-19	MH	6.16958	171.423	690	5708.22	M
MH09	136	2009-04-19	MH	6.16958	171.423	500	2141.45	M
MH09	137	2009-04-19	MH	6.16958	171.423	540	2706.77	M
MH09	139	2009-04-19	MH	6.16958	171.423	500	2141.45	M
MH09	140	2009-04-19	MH	6.16958	171.423	600	3730.24	F
MH09	141	2009-04-19	MH	6.16958	171.423	550	2862.25	F
PG07	193	2007-03-01	PG	-6.46002	150.367	430	1353.08	M
PG07	194	2007-03-01	PG	-6.46002	150.367	440		F
PG07	195	2007-03-01	PG	-6.46002	150.367	460	1661.42	F
PG07	196	2007-03-01	PG	-6.46002	150.367	450	1553.9	M
PG07	197	2007-03-01	PG	-6.46002	150.367	450	1553.9	M
PG07	198	2007-03-01	PG	-6.46002	150.367	450	1553.9	M
PG07	199	2007-03-01	PG	-6.46002	150.367	480	1891.22	F
PG07	200	2007-03-01	PG	-6.46002	150.367	470	1773.82	M
PG07	201	2007-03-01	PG	-6.46002	150.367	460		F
PG07	202	2007-03-01	PG	-6.46002	150.367	430		M
PG07	203	2007-03-01	PG	-6.46002	150.367	440	1451.16	M
PG07	204	2007-03-01	PG	-6.46002	150.367	450		M
PG07	205	2007-03-01	PG	-6.46002	150.367	440	1451.16	M
PG07	206	2007-03-01	PG	-6.46002	150.367	480		F
PG07	208	2007-03-02	PG	-6.37667	150.392	480	1891.22	M
PG07	209	2007-03-02	PG	-6.37667	150.392	470	1773.82	F
PG07	210	2007-03-02	PG	-6.37667	150.392	480	1891.22	M
PG07	211	2007-03-02	PG	-6.37667	150.392	480	1891.22	F
PG07	212	2007-03-02	PG	-6.37667	150.392	470	1773.82	M
PG07	213	2007-03-02	PG	-6.37667	150.392	460	1661.42	F
PG07	214	2007-03-02	PG	-6.37667	150.392	470	1773.82	M
PG07	216	2007-03-02	PG	-6.37667	150.392	430	1353.08	F
PG07	217	2007-03-02	PG	-6.37667	150.392	440	1451.16	F
PG07	218	2007-03-02	PG	-6.37667	150.392	520	2413.01	M
PG07	219	2007-03-02	PG	-6.37667	150.392	470	1773.82	M
PG07	221	2007-03-03	PG	-6.90333	147.824	300	452.274	U
PG07	222	2007-03-03	PG	-6.90333	147.824	300	452.274	U
PG07	223	2007-03-03	PG	-6.90333	147.824	330	604.506	U
PG09	226	2009-03-16	PG	-10.4689	156.029	530	2557.05	F
PG09	228	2009-03-16	PG	-10.4689	156.029	380	928.764	U
PG09	229	2009-03-16	PG	-10.4689	156.029	360	787.824	U
PG09	230	2009-03-16	PG	-10.4689	156.029	470	1773.82	F
PG09	231	2009-03-16	PG	-10.4689	156.029	470	1773.82	F
PG09	232	2009-03-16	PG	-10.4689	156.029	600	3730.24	F
PG09	233	2009-03-16	PG	-10.4689	156.029	550	2862.25	F
PG09	234	2009-03-17	PG	-10.9713	154.061	530	2557.05	F
PG09	235	2009-03-17	PG	-10.9713	154.061	540	2706.77	F
PG09	236	2009-03-17	PG	-10.9713	154.061	480	1891.22	M
PG09	237	2009-03-17	PG	-10.9713	154.061	480	1891.22	M
PG09	238	2009-03-17	PG	-10.9713	154.061	530	2557.05	M
PG09	239	2009-03-17	PG	-10.9713	154.061	510	2274.51	F
PG09	240	2009-03-17	PG	-10.9713	154.061	520	2413.01	F
PG09	241	2009-03-17	PG	-10.9713	154.061	550	2862.25	F
PG09	242	2009-03-17	PG	-10.9713	154.061	540	2706.77	M
PG09	243	2009-03-17	PG	-10.9713	154.061	480	1891.22	M
PG09	244	2009-03-17	PG	-10.9713	154.061	510	2274.51	F
PG09	245	2009-03-17	PG	-10.9713	154.061	530	2557.05	F
PG09	246	2009-03-17	PG	-10.9713	154.061	520	2413.01	F
PG09	247	2009-03-17	PG	-10.9713	154.061	490	2013.73	F
PG09	248	2009-03-17	PG	-10.9713	154.061	530	2557.05	M
PG09	249	2009-03-17	PG	-10.7204	154.058	620	4121.78	F
PG09	250	2009-03-17	PG	-10.7204	154.058	450	1553.9	M
PG09	251	2009-03-17	PG	-10.7204	154.058	500	2141.45	F
PG09	252	2009-03-17	PG	-10.7204	154.058	490	2013.73	M
PG09	253	2009-03-17	PG	-10.7204	154.058	500	2141.45	M
PG09	254	2009-03-17	PG	-10.7204	154.058	480	1891.22	F
PG09	255	2009-03-21	PG	-10.8188	154.348	400	1085.71	U
PG09	256	2009-03-21	PG	-10.8188	154.348	470	1773.82	F
PG09	257	2009-03-21	PG	-10.8188	154.348	460	1661.42	F
PG11	293	2011-04-14	PG	-10.0814	155.15	450	1553.9	F
PG11	294	2011-04-14	PG	-10.0814	155.15	490	2013.73	F
PG11	295	2011-04-14	PG	-10.0814	155.15	470	1773.82	M
PG11	297	2011-04-14	PG	-10.0814	155.15	500	2141.45	M
PG11	298	2011-04-14	PG	-10.0814	155.15	470	1773.82	F
PG11	299	2011-04-14	PG	-10.0814	155.15	530	2557.05	F
PG11	301	2011-04-14	PG	-10.0814	155.15	460	1661.42	F
PG11	302	2011-04-14	PG	-10.0814	155.15	480	1891.22	F
PG11	303	2011-04-14	PG	-10.0814	155.15	470	1773.82	M
PG11	304	2011-04-14	PG	-10.0814	155.15	440	1451.16	M
PG11	305	2011-04-14	PG	-10.0814	155.15	440	1451.16	F
PG11	306	2011-04-14	PG	-10.0814	155.15	430	1353.08	M
PG11	307	2011-04-14	PG	-10.0814	155.15	450	1553.9	M
PG11	308	2011-04-21	PG	-9.83217	151.596	400	1085.71	U
PG11	309	2011-04-21	PG	-9.83217	151.596	350	723.082	M
PG11	310	2011-04-21	PG	-9.83217	151.596	340	662.012	M
PG11	311	2011-04-21	PG	-9.83217	151.596	340	662.012	F
PG11	312	2011-04-21	PG	-9.83217	151.596	350	723.082	M
PG11	313	2011-04-21	PG	-9.83217	151.596	350	723.082	M
PG11	314	2011-04-21	PG	-9.83217	151.596	340	662.012	U
PG11	315	2011-04-21	PG	-9.49827	151.407	670	5219.34	F
PG11	316	2011-04-21	PG	-9.49827	151.407	670	5219.34	M
PG11	317	2011-04-21	PG	-9.49827	151.407	640	4540	M
PG11	318	2011-04-21	PG	-9.49827	151.407	670	5219.34	F
PG11	319	2011-04-21	PG	-9.49827	151.407	680	5460.11	M
PG11	320	2011-04-21	PG	-9.49827	151.407	670	5219.34	M
PG11	321	2011-04-21	PG	-9.49827	151.407	680	5460.11	F
PG11	322	2011-04-21	PG	-9.49827	151.407	650	4759.4	F
PG11	323	2011-04-21	PG	-9.49827	151.407	690	5708.22	F
PG11	324	2011-04-21	PG	-9.49827	151.407	640	4540	M
PG12	326	2012-03-02	PG	-4.14083	148.256	480	1891.22	F
PG12	327	2012-03-02	PG	-4.14083	148.256	470	1773.82	F
PG12	328	2012-03-02	PG	-4.14083	148.256	440	1451.16	F
PG12	329	2012-03-02	PG	-4.14083	148.256	470	1773.82	F
PG12	330	2012-03-02	PG	-4.14083	148.256	460	1661.42	M
PG12	331	2012-03-02	PG	-4.14083	148.256	500	2141.45	F
PG12	332	2012-03-02	PG	-4.14083	148.256	470	1773.82	M
PG12	334	2012-03-02	PG	-4.14083	148.256	480	1891.22	F
PG12	335	2012-03-02	PG	-4.14083	148.256	470	1773.82	M
PG12	336	2012-03-06	PG	-0.0233333	149.993	470	1773.82	F
PG12	337	2012-03-06	PG	-0.0233333	149.993	490	2013.73	F
PG12	338	2012-03-06	PG	-0.0233333	149.993	500	2141.45	F
PG12	341	2012-03-06	PG	-0.0233333	149.993	450	1553.9	F
PG12	342	2012-03-06	PG	-0.0233333	149.993	580	3364.49	F
PG12	343	2012-03-06	PG	-0.0233333	149.993	540	2706.77	F
PG12	344	2012-03-06	PG	-0.0233333	149.993	480	1891.22	F
PG12	345	2012-03-11	PG	-3.25957	150.91	420	1259.55	F
PG12	346	2012-03-11	PG	-3.25957	150.91	420	1259.55	F
PG12	347	2012-03-11	PG	-3.25957	150.91	460	1661.42	F
PG12	348	2012-03-11	PG	-3.25957	150.91	500	2141.45	M
PG12	349	2012-03-11	PG	-3.25957	150.91	440	1451.16	F
PG12	350	2012-03-11	PG	-3.25957	150.91	470	1773.82	F
PG12	351	2012-03-11	PG	-3.25957	150.91	520	2413.01	M
PG12	352	2012-03-11	PG	-3.25957	150.91	450	1553.9	M
PG12	353	2012-03-11	PG	-3.25957	150.91	490	2013.73	F
PG12	354	2012-03-11	PG	-3.25957	150.91	500	2141.45	F
PG12	355	2012-03-14	PG	-6.35	150.493	390	1005.18	U
ID09	394	2009-08-24	ID	0.563367	131.558	430	1353.08	F
ID09	395	2009-08-24	ID	0.563367	131.558	420	1259.55	M
ID09	396	2009-08-24	ID	0.563367	131.558	410	1170.46	M
ID09	397	2009-08-24	ID	0.563367	131.558	400	1085.71	U
ID09	398	2009-08-24	ID	0.563367	131.558	390	1005.18	M
ID09	399	2009-08-24	ID	0.563367	131.558	410	1170.46	M
ID09	400	2009-08-24	ID	0.563367	131.558	370	856.348	M
ID09	401	2009-08-24	ID	0.563367	131.558	370	856.348	U
ID09	402	2009-08-24	ID	0.563367	131.558	350	723.082	M
ID09	403	2009-08-24	ID	0.563367	131.558	350	723.082	M
ID09	404	2009-08-24	ID	0.563367	131.558	350	723.082	M
ID09	405	2009-08-24	ID	0.563367	131.558	360	787.824	F
ID09	406	2009-08-24	ID	0.563367	131.558	340	662.012	U
ID09	410	2009-08-24	ID	0.614767	131.489	420	1259.55	F
ID09	412	2009-08-24	ID	0.614767	131.489	510	2274.51	F
ID09	413	2009-08-24	ID	0.614767	131.489	450	1553.9	F
ID09	414	2009-08-24	ID	0.614767	131.489	430	1353.08	F
ID09	415	2009-08-24	ID	0.614767	131.489	430	1353.08	F
ID09	420	2009-08-24	ID	0.614767	131.489	420	1259.55	F
ID09	421	2009-08-24	ID	0.614767	131.489	420	1259.55	F
ID09	422	2009-08-24	ID	0.614767	131.489	430	1353.08	M
ID09	423	2009-09-09	ID	1.06003	130.07	420	1259.55	M
ID09	424	2009-09-09	ID	1.06003	130.07	390	1005.18	F
PW08	445	2008-08-18	PW	7.324	134.828	310	499.746	U
PW08	446	2008-08-18	PW	7.324	134.828	300	452.274	U
PW08	447	2008-08-18	PW	7.324	134.828	290	407.928	U
PW08	448	2008-08-18	PW	7.324	134.828	290	407.928	U
PW08	449	2008-08-18	PW	7.324	134.828	300	452.274	U
PW08	450	2008-08-18	PW	7.324	134.828	310	499.746	U
PW08	451	2008-08-18	PW	7.324	134.828	300	452.274	U
PW08	452	2008-08-18	PW	7.324	134.828	300	452.274	U
PW08	453	2008-08-18	PW	7.324	134.828	300	452.274	U
PW08	455	2008-08-18	PW	7.324	134.828	300	452.274	U
PW08	456	2008-08-18	PW	7.324	134.828	310	499.746	U
PW08	457	2008-08-18	PW	7.324	134.828	300	452.274	U
PW08	458	2008-08-18	PW	7.324	134.828	290	407.928	U
PW08	459	2008-08-18	PW	7.324	134.828	280	366.601	U
PW08	460	2008-08-18	PW	7.53867	134.742	300	452.274	U
PW08	462	2008-08-18	PW	7.53867	134.742	300	452.274	U
PW08	463	2008-08-18	PW	7.53867	134.742	300	452.274	U
PW08	464	2008-08-18	PW	7.53867	134.742	320	550.454	U
PW08	465	2008-08-18	PW	7.53867	134.742	310	499.746	U
PW08	466	2008-08-18	PW	7.53867	134.742	290	407.928	U
PW08	467	2008-08-18	PW	7.53867	134.742	300	452.274	U
PW08	468	2008-08-18	PW	7.53867	134.742	310	499.746	U
PW08	469	2008-08-18	PW	7.53867	134.742	420	1259.55	F
PW08	470	2008-08-18	PW	7.53867	134.742	390	1005.18	U
PW08	471	2008-08-18	PW	7.53867	134.742	420	1259.55	F
PW08	472	2008-08-18	PW	7.53867	134.742	300	452.274	U
PW08	473	2008-08-18	PW	7.53867	134.742	300	452.274	U
PW08	474	2008-08-18	PW	7.53867	134.742	310	499.746	U
PW08	475	2008-08-21	PW	7.59667	134.277	320	550.454	U
PW08	476	2008-08-21	PW	7.59667	134.277	330	604.506	U
